# Supplementary material
Source: MDPI journal article supplement (https://www.mdpi.com/2075-163X/12/6/773)
Supplement: s1 [file s1]

**Table S1.** Concentration\* of chemical elements in filtrates after capsule GWV and successive filtration through Millipore membranes 100, 200, 300, 400, and 500 ml of river water (Milli-100 etc)

|    | Sample<br>R-201 |           |           |           |           |           |          |       |
|----|-----------------|-----------|-----------|-----------|-----------|-----------|----------|-------|
|    | GWV             | Milli-100 | Milli-200 | Milli-300 | Milli-400 | Milli-500 | A_clog** | Cj*** |
| Li | 2.9             | 2.9       | 2.9       | 3.2       | 2.9       | 2.9       | 0.0      | 2.9   |
| B  | 44.0            | 45.6      | 44.5      | 49.4      | 44.6      | 43.8      | -1.6     | 45.6  |
| Al | 72.0            | 76.2      | 15.5      | 5.5       | 3.4       | 3.4       | 51.2     | 20.8  |
| Si | 8.41            | 9.08      | 8.63      | 8.71      | 8.58      | 8.45      | -0.28    | 8.69  |
| Sc | 0.04            | 0.05      | 0.04      | 0.04      | 0.05      | 0.04      | -0.01    | 0.04  |
| Ti | 0.24            | 1.00      | 0.30      | 0.12      | 0.46      | 0.06      | -0.15    | 0.39  |
| V  | 0.28            | 0.41      | 0.31      | 0.30      | 0.31      | 0.27      | 0.09     | 0.32  |
| Cr | 0.12            | 4.25      | 0.68      | 0.56      | 0.19      | 0.13      | -1.04    | 1.16  |
| Mn | 129.0           | 154.6     | 134.3     | 132.9     | 134.2     | 127.4     | -7.7     | 136.7 |
| Fe | 127.9           | 124.0     | 45.5      | 13.2      | 19.6      | 6.3       | 86.2     | 41.7  |
| Co | 0.31            | 0.32      | 0.30      | 0.33      | 0.30      | 0.28      | 0.01     | 0.31  |
| Ni | 1.28            | 2.53      | 1.31      | 1.43      | 1.28      | 1.24      | -0.28    | 1.56  |
| Cu | 0.87            | 0.93      | 0.91      | 1.16      | 0.87      | 0.82      | -0.07    | 0.94  |
| As | 0.48            | 0.62      | 0.51      | 0.46      | 0.51      | 0.43      | -0.03    | 0.50  |
| Rb | 1.01            | 1.11      | 1.04      | 1.14      | 1.04      | 1.01      | -0.06    | 1.07  |
| Sr | 175             | 183       | 180       | 196       | 179       | 175       | -8       | 183   |
| Y  | 0.06            | 0.07      | 0.06      | 0.05      | 0.05      | 0.04      | 0.01     | 0.06  |
| Zr | 0.09            | 0.14      | 0.08      | 0.10      | 0.15      | 0.09      | -0.02    | 0.11  |
| Mo | 0.45            | 0.63      | 0.51      | 0.57      | 0.45      | 0.44      | -0.07    | 0.52  |
| Cd | 0.005           | 0.006     | 0.002     | 0.005     | 0.003     | 0.003     | 0.001    | 0.004 |
| Ba | 22.9            | 23.9      | 23.4      | 25.2      | 23.8      | 22.7      | -0.9     | 23.8  |
| La | 0.031           | 0.049     | 0.031     | 0.023     | 0.019     | 0.014     | 0.004    | 0.027 |
| Ce | 0.047           | 0.078     | 0.052     | 0.039     | 0.030     | 0.018     | 0.004    | 0.043 |
| Pr | 0.008           | 0.012     | 0.008     | 0.006     | 0.005     | 0.004     | 0.001    | 0.007 |
| Nd | 0.039           | 0.054     | 0.036     | 0.028     | 0.022     | 0.018     | 0.008    | 0.032 |
| Sm | 0.009           | 0.013     | 0.009     | 0.007     | 0.006     | 0.005     | 0.002    | 0.008 |
| Eu | 0.004           | 0.005     | 0.004     | 0.004     | 0.003     | 0.003     | 0.000    | 0.004 |
| Gd | 0.015           | 0.018     | 0.014     | 0.012     | 0.011     | 0.009     | 0.002    | 0.013 |
| Tb | 0.001           | 0.002     | 0.001     | 0.001     | 0.001     | 0.001     | 0.000    | 0.001 |
| Dy | 0.009           | 0.011     | 0.009     | 0.007     | 0.006     | 0.005     | 0.001    | 0.008 |
| Ho | 0.002           | 0.003     | 0.002     | 0.002     | 0.002     | 0.001     | 0.000    | 0.002 |
| Er | 0.009           | 0.010     | 0.009     | 0.009     | 0.008     | 0.005     | 0.001    | 0.008 |
| Tm | 0.001           | 0.001     | 0.001     | 0.001     | 0.001     | 0.001     | 0.000    | 0.001 |
| Yb | 0.009           | 0.009     | 0.008     | 0.008     | 0.007     | 0.007     | 0.001    | 0.008 |
| Lu | 0.002           | 0.002     | 0.002     | 0.002     | 0.001     | 0.001     | 0.000    | 0.002 |
| Hf | 0.003           | 0.004     | 0.003     | 0.003     | 0.004     | 0.003     | 0.000    | 0.003 |
| Pb | 0.035           | cont      | cont      | cont      | 0.028     | 0.021     | nd       | nd    |
| U  | 0.184           | 0.188     | 0.183     | 0.200     | 0.188     | 0.182     | -0.004   | 0.188 |

\* - Si in mg/L, other elements - in µg/L

A\_clog\*\* - concentration of colloidal forms retained by clogged membranes  $(C_i \cdot V_i - V_j \cdot \sum C_j) / V_i$

Cj\*\*\* - averaged concentration after filtration of 0,5 L through Millipore membrane 0.45 µm;

cont – contamination; nd – not determined

Table S1. (continued)

|    | Sample<br>R-210 |           |           |           |           |           |        |       |
|----|-----------------|-----------|-----------|-----------|-----------|-----------|--------|-------|
|    | GWV             | Milli-100 | Milli-200 | Milli-300 | Milli-400 | Milli-500 | A_clog | Cj    |
| Li | 1.5             | 1.4       | 1.4       | 1.4       | 1.4       | 1.3       | 0.1    | 1.4   |
| B  | 17.8            | 16.7      | 16.9      | 17.2      | 18.5      | 16.6      | 0.6    | 17.2  |
| Al | 299.9           | 310.2     | 97.4      | 44.9      | 30.7      | 40.4      | 195.2  | 104.7 |
| Si | 5.70            | 5.68      | 5.27      | 5.23      | 5.19      | 5.12      | 0.40   | 5.30  |
| Sc | 0.08            | 0.10      | 0.05      | 0.04      | 0.04      | 0.04      | 0.03   | 0.05  |
| Ti | 7.30            | 6.69      | 1.89      | 0.76      | 0.14      | 0.38      | 5.33   | 1.97  |
| V  | 1.24            | 1.29      | 0.97      | 0.86      | 0.87      | 0.86      | 0.27   | 0.97  |
| Cr | 0.39            | 0.40      | 0.23      | 0.22      | 0.16      | 0.18      | 0.15   | 0.24  |
| Mn | 10.4            | 12.4      | 11.0      | 9.9       | 8.6       | 6.5       | 0.7    | 9.7   |
| Fe | 234.2           | 261.0     | 93.6      | 25.6      | 9.8       | 21.8      | 151.9  | 82.4  |
| Co | 0.12            | 0.10      | 0.08      | 0.08      | 0.08      | 0.06      | 0.04   | 0.08  |
| Ni | 0.98            | 0.90      | 0.84      | 0.82      | 0.89      | 0.81      | 0.12   | 0.85  |
| Cu | 0.94            | 0.95      | 0.92      | 1.00      | 0.92      | 0.88      | 0.01   | 0.93  |
| As | 0.78            | 0.80      | 0.70      | 0.68      | 0.69      | 0.66      | 0.07   | 0.71  |
| Rb | 0.52            | 0.52      | 0.33      | 0.30      | 0.29      | 0.29      | 0.17   | 0.35  |
| Sr | 72              | 67        | 69        | 70        | 76        | 68        | 2      | 70    |
| Y  | 0.19            | 0.19      | 0.11      | 0.08      | 0.08      | 0.07      | 0.09   | 0.11  |
| Zr | 0.39            | 0.44      | 0.24      | 0.17      | 0.20      | 0.22      | 0.14   | 0.25  |
| Mo | 0.48            | 0.45      | 0.45      | 0.44      | 0.48      | 0.43      | 0.02   | 0.45  |
| Cd | 0.002           | 0.003     | 0.002     | 0.002     | 0.003     | 0.002     | 0.000  | 0.002 |
| Ba | 12.0            | 11.1      | 10.6      | 10.6      | 11.4      | 10.5      | 1.2    | 10.8  |
| La | 0.199           | 0.216     | 0.102     | 0.047     | 0.045     | 0.039     | 0.110  | 0.090 |
| Ce | 0.380           | 0.435     | 0.182     | 0.072     | 0.065     | 0.059     | 0.217  | 0.163 |
| Pr | 0.049           | 0.052     | 0.026     | 0.012     | 0.011     | 0.010     | 0.027  | 0.022 |
| Nd | 0.199           | 0.211     | 0.112     | 0.055     | 0.051     | 0.047     | 0.103  | 0.095 |
| Sm | 0.044           | 0.046     | 0.024     | 0.013     | 0.012     | 0.012     | 0.022  | 0.021 |
| Eu | 0.009           | 0.009     | 0.006     | 0.004     | 0.004     | 0.003     | 0.004  | 0.005 |
| Gd | 0.044           | 0.046     | 0.026     | 0.015     | 0.014     | 0.013     | 0.021  | 0.023 |
| Tb | 0.006           | 0.007     | 0.004     | 0.002     | 0.002     | 0.002     | 0.003  | 0.003 |
| Dy | 0.035           | 0.036     | 0.020     | 0.012     | 0.012     | 0.011     | 0.017  | 0.018 |
| Ho | 0.007           | 0.008     | 0.004     | 0.003     | 0.003     | 0.002     | 0.003  | 0.004 |
| Er | 0.023           | 0.023     | 0.014     | 0.010     | 0.010     | 0.009     | 0.009  | 0.013 |
| Tm | 0.003           | 0.003     | 0.002     | 0.001     | 0.001     | 0.001     | 0.001  | 0.002 |
| Yb | 0.019           | 0.020     | 0.012     | 0.009     | 0.009     | 0.008     | 0.008  | 0.011 |
| Lu | 0.003           | 0.003     | 0.002     | 0.002     | 0.002     | 0.001     | 0.001  | 0.002 |
| Hf | 0.012           | 0.012     | 0.007     | 0.004     | 0.006     | 0.006     | 0.005  | 0.007 |
| Pb | 0.147           | 0.141     | 0.066     | 0.041     | 0.044     | 0.031     | 0.083  | 0.064 |
| U  | 0.109           | 0.103     | 0.104     | 0.101     | 0.106     | 0.096     | 0.007  | 0.102 |

Table S1 (continued)

|           | Sample<br>R-91 |           |           |           |           |           |           |       |
|-----------|----------------|-----------|-----------|-----------|-----------|-----------|-----------|-------|
|           | GWV            | Milli-100 | Milli-200 | Milli-300 | Milli-400 | Milli-500 | A_clogged | Cj    |
| <b>Li</b> | 1.0            | 0.9       | 0.9       | 0.9       | 0.8       | 0.9       | 0.1       | 0.9   |
| <b>B</b>  | 13.4           | 12.9      | 14.0      | 13.5      | 13.0      | 13.1      | 0.1       | 13.3  |
| <b>Al</b> | 142.7          | 79.5      | 8.7       | 5.5       | 6.4       | 5.4       | 121.6     | 21.1  |
| <b>Si</b> | 9.35           | 8.84      | 9.15      | 8.94      | 9.26      | 8.81      | 0.35      | 9.00  |
| <b>Sc</b> | 0.08           | 0.03      | 0.04      | 0.04      | 0.05      | 0.04      | 0.04      | 0.04  |
| <b>Ti</b> | 6.34           | 2.85      | 0.60      | 0.50      | 0.42      | 0.54      | 5.36      | 0.98  |
| <b>V</b>  | 2.05           | 2.02      | 1.80      | 1.78      | 1.93      | 1.73      | 0.19      | 1.85  |
| <b>Cr</b> | 0.52           | 0.42      | 0.32      | 0.30      | 0.29      | 0.27      | 0.20      | 0.32  |
| <b>Mn</b> | 11.1           | 9.8       | 6.4       | 3.7       | 0.6       | 0.4       | 6.9       | 4.2   |
| <b>Fe</b> | 158.5          | 112.4     | 34.0      | 26.3      | 25.7      | 22.7      | 114.3     | 44.2  |
| <b>Co</b> | 0.14           | 0.11      | 0.09      | 0.08      | 0.06      | 0.07      | 0.06      | 0.08  |
| <b>Ni</b> | 1.94           | 1.89      | 1.93      | 1.80      | 1.85      | 1.61      | 0.12      | 1.82  |
| <b>Cu</b> | 1.91           | 1.71      | 1.77      | 1.69      | 1.68      | 1.70      | 0.20      | 1.71  |
| <b>As</b> | 0.79           | 0.82      | 0.82      | 0.75      | 0.79      | 0.81      | -0.01     | 0.80  |
| <b>Rb</b> | 0.52           | 0.38      | 0.38      | 0.37      | 0.33      | 0.36      | 0.15      | 0.36  |
| <b>Sr</b> | 57             | 51        | 57        | 56        | 53        | 55        | 3         | 55    |
| <b>Y</b>  | 0.55           | 0.48      | 0.42      | 0.38      | 0.34      | 0.34      | 0.16      | 0.39  |
| <b>Zr</b> | 0.63           | 0.41      | 0.39      | 0.36      | 0.33      | 0.33      | 0.27      | 0.36  |
| <b>Mo</b> | 0.34           | 0.31      | 0.38      | 0.37      | 0.36      | 0.37      | -0.02     | 0.36  |
| <b>Cd</b> | 0.004          | 0.004     | 0.002     | 0.005     | 0.006     | 0.004     | 0.000     | 0.004 |
| <b>Ba</b> | 9.6            | 11.0      | 11.7      | 10.9      | 10.1      | 10.6      | -1.3      | 10.9  |
| <b>La</b> | 0.400          | 0.357     | 0.255     | 0.223     | 0.192     | 0.191     | 0.157     | 0.243 |
| <b>Ce</b> | 0.688          | 0.613     | 0.342     | 0.303     | 0.246     | 0.233     | 0.341     | 0.347 |
| <b>Pr</b> | 0.109          | 0.096     | 0.070     | 0.062     | 0.053     | 0.096     | 0.034     | 0.075 |
| <b>Nd</b> | 0.483          | 0.418     | 0.314     | 0.287     | 0.245     | 0.371     | 0.156     | 0.327 |
| <b>Sm</b> | 0.112          | 0.094     | 0.075     | 0.068     | 0.059     | 0.058     | 0.041     | 0.071 |
| <b>Eu</b> | 0.025          | 0.022     | 0.019     | 0.016     | 0.014     | 0.014     | 0.008     | 0.017 |
| <b>Gd</b> | 0.119          | 0.104     | 0.080     | 0.074     | 0.069     | 0.080     | 0.038     | 0.081 |
| <b>Tb</b> | 0.017          | 0.015     | 0.012     | 0.011     | 0.010     | 0.010     | 0.005     | 0.011 |
| <b>Dy</b> | 0.094          | 0.081     | 0.067     | 0.062     | 0.054     | 0.058     | 0.029     | 0.065 |
| <b>Ho</b> | 0.019          | 0.017     | 0.014     | 0.013     | 0.012     | 0.012     | 0.005     | 0.013 |
| <b>Er</b> | 0.057          | 0.048     | 0.043     | 0.040     | 0.036     | 0.035     | 0.016     | 0.041 |
| <b>Tm</b> | 0.007          | 0.006     | 0.006     | 0.005     | 0.005     | 0.005     | 0.002     | 0.005 |
| <b>Yb</b> | 0.047          | 0.040     | 0.036     | 0.033     | 0.031     | 0.030     | 0.013     | 0.034 |
| <b>Lu</b> | 0.007          | 0.006     | 0.006     | 0.005     | 0.005     | 0.005     | 0.002     | 0.005 |
| <b>Hf</b> | 0.013          | 0.011     | 0.009     | 0.008     | 0.006     | 0.007     | 0.005     | 0.008 |
| <b>Pb</b> | cont           | cont      | cont      | cont      | cont      | cont      | nd        | nd    |
| <b>U</b>  | 0.080          | 0.072     | 0.077     | 0.075     | 0.069     | 0.070     | 0.008     | 0.072 |

Table S1 (continued)

|    | Sample<br>R-80 |           |           |           |           |           |           |       |
|----|----------------|-----------|-----------|-----------|-----------|-----------|-----------|-------|
|    | GWV            | Milli-100 | Milli-200 | Milli-300 | Milli-400 | Milli-500 | A_clogged | Cj    |
| Li | 1.4            | 1.4       | 1.5       | 1.3       | 1.5       | 1.4       | 0.0       | 1.4   |
| B  | nd             | nd        | nd        | nd        | nd        | nd        | nd        | nd    |
| Al | 30.7           | 26.2      | 6.5       | 7.1       | 4.7       | 5.5       | 20.7      | 10.0  |
| Si | 10.1           | 10.0      | 10.0      | 10.4      | 10.3      | 10.5      | -0.2      | 10.2  |
| Sc | 0.07           | 0.06      | 0.06      | 0.05      | 0.06      | 0.06      | 0.01      | 0.06  |
| Ti | 1.48           | 1.06      | 0.29      | 0.26      | 0.28      | 0.45      | 1.01      | 0.47  |
| V  | 1.31           | 1.47      | 1.40      | 1.52      | 1.49      | 1.59      | -0.18     | 1.49  |
| Cr | 0.30           | 0.29      | 0.24      | 0.25      | 0.23      | 0.27      | 0.04      | 0.26  |
| Mn | 41.5           | 28.4      | 21.2      | 9.0       | 0.5       | 0.3       | 29.6      | 11.9  |
| Fe | 79.2           | 81.4      | 31.3      | 25.2      | 18.3      | 25.0      | 42.9      | 36.2  |
| Co | 0.37           | 0.23      | 0.19      | 0.13      | 0.08      | 0.07      | 0.23      | 0.14  |
| Ni | 1.67           | 1.67      | 1.59      | 1.57      | 1.47      | 1.51      | 0.11      | 1.56  |
| Cu | 1.36           | 1.27      | 1.28      | 1.37      | 1.33      | 1.47      | 0.01      | 1.35  |
| As | 0.88           | 0.96      | 0.92      | 0.92      | 0.90      | 0.95      | -0.05     | 0.93  |
| Rb | 0.84           | 0.78      | 0.80      | 0.73      | 0.80      | 0.72      | 0.07      | 0.77  |
| Sr | 78             | 77        | 82        | 77        | 85        | 80        | -2        | 80    |
| Y  | 0.74           | 0.40      | 0.34      | 0.27      | 0.28      | 0.26      | 0.42      | 0.31  |
| Zr | 0.39           | 0.42      | 0.33      | 0.29      | 0.30      | 0.28      | 0.07      | 0.32  |
| Mo | nd             | nd        | nd        | nd        | nd        | nd        | nd        | nd    |
| Cd | 0.009          | 0.006     | 0.004     | 0.005     | 0.005     | 0.004     | 0.005     | 0.005 |
| Ba | 16.6           | 18.0      | 19.0      | 22.3      | 19.0      | 17.9      | -2.7      | 19.2  |
| La | 0.686          | 0.348     | 0.245     | 0.189     | 0.186     | 0.178     | 0.457     | 0.229 |
| Ce | 1.139          | 0.575     | 0.378     | 0.284     | 0.260     | 0.229     | 0.794     | 0.345 |
| Pr | 0.181          | 0.095     | 0.066     | 0.052     | 0.050     | 0.049     | 0.119     | 0.063 |
| Nd | 0.773          | 0.412     | 0.300     | 0.231     | 0.235     | 0.211     | 0.495     | 0.278 |
| Sm | 0.165          | 0.089     | 0.069     | 0.053     | 0.053     | 0.049     | 0.102     | 0.062 |
| Eu | 0.035          | 0.020     | 0.016     | 0.014     | 0.013     | 0.012     | 0.020     | 0.015 |
| Gd | 0.171          | 0.094     | 0.071     | 0.058     | 0.057     | 0.052     | 0.105     | 0.066 |
| Tb | 0.022          | 0.013     | 0.010     | 0.008     | 0.008     | 0.008     | 0.013     | 0.009 |
| Dy | 0.126          | 0.072     | 0.057     | 0.048     | 0.047     | 0.045     | 0.072     | 0.054 |
| Ho | 0.025          | 0.014     | 0.012     | 0.010     | 0.010     | 0.009     | 0.014     | 0.011 |
| Er | 0.072          | 0.042     | 0.036     | 0.028     | 0.029     | 0.027     | 0.040     | 0.032 |
| Tm | 0.010          | 0.006     | 0.005     | 0.004     | 0.004     | 0.004     | 0.005     | 0.004 |
| Yb | 0.060          | 0.036     | 0.032     | 0.026     | 0.026     | 0.024     | 0.031     | 0.029 |
| Lu | 0.010          | 0.006     | 0.005     | 0.004     | 0.004     | 0.004     | 0.005     | 0.005 |
| Hf | 0.010          | 0.011     | 0.007     | 0.007     | 0.006     | 0.007     | 0.002     | 0.008 |
| Pb | 0.108          | 0.117     | 0.045     | 0.043     | 0.097     | 0.038     | 0.040     | 0.068 |
| U  | 0.090          | 0.083     | 0.092     | 0.081     | 0.095     | 0.082     | 0.003     | 0.087 |

Table S1 (continued)

|           | Sample<br>R-83 |           |           |           |           |           |           |       |
|-----------|----------------|-----------|-----------|-----------|-----------|-----------|-----------|-------|
|           | GWV            | Milli-100 | Milli-200 | Milli-300 | Milli-400 | Milli-500 | A_clogged | Cj    |
| <b>Li</b> | 1.9            | 1.5       | 1.3       | 1.3       | 1.3       | 1.3       | 0.6       | 1.3   |
| <b>B</b>  | nd             | nd        | nd        | nd        | nd        | nd        | nd        | nd    |
| <b>Al</b> | 334.0          | 308.7     | 9.1       | 4.4       | 4.2       | 3.8       | 268.0     | 66.0  |
| <b>Si</b> | 11.38          | 10.04     | 9.00      | 8.99      | 8.95      | 8.99      | 2.18      | 9.19  |
| <b>Sc</b> | 0.13           | 0.13      | 0.05      | 0.05      | 0.05      | 0.05      | 0.07      | 0.06  |
| <b>Ti</b> | 12.03          | 13.57     | 0.36      | 0.20      | 0.10      | 0.09      | 9.17      | 2.87  |
| <b>V</b>  | 0.91           | 0.92      | 0.37      | 0.37      | 0.46      | 0.44      | 0.40      | 0.51  |
| <b>Cr</b> | 0.95           | 0.97      | 0.73      | 0.84      | 0.64      | 0.78      | 0.16      | 0.79  |
| <b>Mn</b> | 45.7           | 43.8      | 41.1      | 40.7      | 34.2      | 28.9      | 7.9       | 37.7  |
| <b>Fe</b> | 291.7          | 304.0     | 21.5      | 9.5       | 7.7       | 7.9       | 221.5     | 70.1  |
| <b>Co</b> | 0.32           | 0.23      | 0.18      | 0.17      | 0.15      | 0.13      | 0.15      | 0.17  |
| <b>Ni</b> | 1.36           | 1.41      | 1.03      | 1.03      | 0.99      | 0.92      | 0.28      | 1.08  |
| <b>Cu</b> | 0.97           | 1.02      | 0.83      | 0.89      | 0.85      | 0.84      | 0.09      | 0.89  |
| <b>As</b> | 0.59           | 0.61      | 0.47      | 0.49      | 0.53      | 0.48      | 0.07      | 0.52  |
| <b>Rb</b> | 0.86           | 0.81      | 0.44      | 0.45      | 0.44      | 0.45      | 0.34      | 0.52  |
| <b>Sr</b> | 89             | 85        | 86        | 86        | 85        | 87        | 3         | 86    |
| <b>Y</b>  | 0.21           | 0.24      | 0.11      | 0.09      | 0.08      | 0.07      | 0.09      | 0.12  |
| <b>Zr</b> | 0.87           | 0.63      | 0.13      | 0.16      | 0.11      | 0.16      | 0.63      | 0.24  |
| <b>Mo</b> | 0.55           | 0.52      | 0.56      | 0.60      | 0.58      | 0.62      | -0.03     | 0.57  |
| <b>Cd</b> | 0.004          | 0.002     | 0.002     | 0.002     | 0.003     | 0.004     | 0.001     | 0.003 |
| <b>Ba</b> | 16.7           | 17.1      | 15.6      | 15.4      | 15.0      | 14.9      | 1.1       | 15.6  |
| <b>La</b> | 0.175          | 0.216     | 0.066     | 0.055     | 0.046     | 0.031     | 0.093     | 0.082 |
| <b>Ce</b> | 0.401          | 0.479     | 0.081     | 0.060     | 0.053     | 0.034     | 0.260     | 0.142 |
| <b>Pr</b> | 0.046          | 0.055     | 0.017     | 0.015     | 0.012     | 0.008     | 0.025     | 0.022 |
| <b>Nd</b> | 0.201          | 0.243     | 0.082     | 0.068     | 0.059     | 0.043     | 0.102     | 0.099 |
| <b>Sm</b> | 0.046          | 0.055     | 0.020     | 0.018     | 0.014     | 0.012     | 0.022     | 0.024 |
| <b>Eu</b> | 0.011          | 0.012     | 0.005     | 0.005     | 0.004     | 0.004     | 0.005     | 0.006 |
| <b>Gd</b> | 0.048          | 0.057     | 0.022     | 0.019     | 0.016     | 0.013     | 0.023     | 0.025 |
| <b>Tb</b> | 0.007          | 0.008     | 0.003     | 0.003     | 0.002     | 0.002     | 0.003     | 0.003 |
| <b>Dy</b> | 0.039          | 0.047     | 0.018     | 0.016     | 0.014     | 0.011     | 0.018     | 0.021 |
| <b>Ho</b> | 0.008          | 0.010     | 0.004     | 0.004     | 0.003     | 0.002     | 0.003     | 0.004 |
| <b>Er</b> | 0.023          | 0.029     | 0.013     | 0.011     | 0.010     | 0.008     | 0.009     | 0.014 |
| <b>Tm</b> | 0.003          | 0.004     | 0.002     | 0.002     | 0.001     | 0.001     | 0.001     | 0.002 |
| <b>Yb</b> | 0.023          | 0.028     | 0.012     | 0.013     | 0.010     | 0.009     | 0.009     | 0.014 |
| <b>Lu</b> | 0.004          | 0.004     | 0.002     | 0.002     | 0.002     | 0.002     | 0.001     | 0.002 |
| <b>Hf</b> | 0.022          | 0.017     | 0.003     | 0.005     | 0.002     | 0.006     | 0.015     | 0.007 |
| <b>Pb</b> | cont           | cont      | cont      | cont      | cont      | cont      | nd        | nd    |
| <b>U</b>  | 0.137          | 0.151     | 0.143     | 0.140     | 0.133     | 0.126     | -0.002    | 0.139 |

Table S1 (continued)

|           | Sample<br>A-2 |           |           |           |           |           |           |       |
|-----------|---------------|-----------|-----------|-----------|-----------|-----------|-----------|-------|
|           | GWV           | Milli-100 | Milli-200 | Milli-300 | Milli-400 | Milli-500 | A_clogged | Cj    |
| <b>Li</b> | 1.9           | 1.9       | 2.1       | 1.8       | 1.9       | 1.7       | 0.0       | 1.9   |
| <b>B</b>  | 15.2          | 13.6      | 14.8      | 13.2      | 13.4      | 12.2      | 1.8       | 13.4  |
| <b>Al</b> | 167.5         | 198.6     | 146.0     | 126.8     | 71.9      | 87.2      | 41.3      | 126.1 |
| <b>Si</b> | 4.47          | 5.30      | 4.81      | 4.68      | 4.61      | 4.73      | -0.36     | 4.83  |
| <b>Sc</b> | 0.10          | 0.12      | 0.10      | 0.09      | 0.08      | 0.09      | 0.00      | 0.10  |
| <b>Ti</b> | 3.94          | 3.31      | 2.90      | 2.20      | 0.91      | 0.92      | 1.89      | 2.05  |
| <b>V</b>  | 0.48          | 0.57      | 0.46      | 0.40      | 0.28      | 0.26      | 0.09      | 0.39  |
| <b>Cr</b> | 0.35          | 0.99      | 0.74      | 0.47      | 0.72      | 0.46      | -0.32     | 0.67  |
| <b>Mn</b> | 21.9          | 22.5      | 20.4      | 19.3      | 18.1      | 17.4      | 2.3       | 19.5  |
| <b>Fe</b> | 314.1         | 349.7     | 293.2     | 254.4     | 140.5     | 114.6     | 83.6      | 230.5 |
| <b>Co</b> | 0.12          | 0.10      | 0.11      | 0.09      | 0.08      | 0.08      | 0.03      | 0.09  |
| <b>Ni</b> | 0.88          | 0.92      | 1.01      | 0.84      | 0.86      | 0.82      | -0.01     | 0.89  |
| <b>Cu</b> | 0.98          | 1.06      | 1.19      | 0.98      | 1.02      | 0.98      | -0.06     | 1.04  |
| <b>As</b> | 0.47          | 0.53      | 0.50      | 0.45      | 0.39      | 0.40      | 0.01      | 0.45  |
| <b>Rb</b> | 0.83          | 0.88      | 0.93      | 0.82      | 0.80      | 0.75      | -0.01     | 0.84  |
| <b>Sr</b> | 84            | 89        | 98        | 89        | 91        | 83        | -6        | 90    |
| <b>Y</b>  | 0.32          | 0.34      | 0.38      | 0.32      | 0.28      | 0.24      | 0.01      | 0.31  |
| <b>Zr</b> | 0.36          | 0.42      | 0.38      | 0.34      | 0.25      | 0.26      | 0.03      | 0.33  |
| <b>Mo</b> | 0.41          | 0.53      | 0.57      | 0.48      | 0.54      | 0.44      | -0.10     | 0.51  |
| <b>Cd</b> | 0.005         | 0.004     | 0.005     | 0.004     | 0.004     | 0.003     | 0.000     | 0.004 |
| <b>Ba</b> | 18.3          | 18.8      | 20.9      | 18.4      | 18.7      | 17.2      | -0.5      | 18.8  |
| <b>La</b> | 0.341         | 0.357     | 0.386     | 0.317     | 0.249     | 0.209     | 0.038     | 0.303 |
| <b>Ce</b> | 0.468         | 0.501     | 0.533     | 0.423     | 0.325     | 0.261     | 0.060     | 0.409 |
| <b>Pr</b> | 0.086         | 0.091     | 0.100     | 0.081     | 0.065     | 0.054     | 0.008     | 0.078 |
| <b>Nd</b> | 0.353         | 0.370     | 0.402     | 0.331     | 0.273     | 0.224     | 0.033     | 0.320 |
| <b>Sm</b> | 0.075         | 0.077     | 0.081     | 0.070     | 0.057     | 0.048     | 0.009     | 0.067 |
| <b>Eu</b> | 0.014         | 0.016     | 0.017     | 0.015     | 0.012     | 0.010     | 0.000     | 0.014 |
| <b>Gd</b> | 0.070         | 0.075     | 0.083     | 0.072     | 0.058     | 0.048     | 0.003     | 0.067 |
| <b>Tb</b> | 0.010         | 0.010     | 0.011     | 0.009     | 0.008     | 0.007     | 0.001     | 0.009 |
| <b>Dy</b> | 0.051         | 0.055     | 0.060     | 0.052     | 0.045     | 0.038     | 0.001     | 0.050 |
| <b>Ho</b> | 0.011         | 0.012     | 0.013     | 0.011     | 0.009     | 0.008     | 0.000     | 0.011 |
| <b>Er</b> | 0.033         | 0.036     | 0.038     | 0.033     | 0.029     | 0.025     | 0.001     | 0.032 |
| <b>Tm</b> | 0.005         | 0.005     | 0.006     | 0.005     | 0.004     | 0.004     | 0.000     | 0.005 |
| <b>Yb</b> | 0.031         | 0.033     | 0.036     | 0.031     | 0.027     | 0.025     | 0.001     | 0.030 |
| <b>Lu</b> | 0.005         | 0.005     | 0.006     | 0.005     | 0.005     | 0.004     | 0.000     | 0.005 |
| <b>Hf</b> | 0.011         | 0.013     | 0.013     | 0.010     | 0.009     | 0.009     | 0.000     | 0.011 |
| <b>Pb</b> | 0.099         | cont      | cont      | cont      | cont      | cont      | nd        | nd    |
| <b>U</b>  | 0.166         | 0.188     | 0.211     | 0.184     | 0.187     | 0.169     | -0.022    | 0.188 |

Table S1 (continued)

|           | Sample<br>A-4 |           |           |           |           |           |           |       |
|-----------|---------------|-----------|-----------|-----------|-----------|-----------|-----------|-------|
|           | GWV           | Milli_100 | Milli_200 | Milli_300 | Milli_400 | Milli-500 | A_clogged | Cj    |
| <b>Li</b> | 1.5           | 1.4       | 1.6       | 1.4       | 1.4       | 1.4       | 0.1       | 1.4   |
| <b>B</b>  | 7.2           | 6.7       | 8.0       | 6.6       | 7.2       | 6.8       | 0.1       | 7.1   |
| <b>Al</b> | 198.4         | 164.0     | 50.0      | 37.0      | 31.9      | 15.4      | 138.8     | 59.7  |
| <b>Si</b> | 4.55          | 4.40      | 4.34      | 4.17      | 4.75      | 4.29      | 0.16      | 4.39  |
| <b>Sc</b> | 0.09          | 0.08      | 0.06      | 0.05      | 0.06      | 0.05      | 0.03      | 0.06  |
| <b>Ti</b> | 5.60          | 4.45      | 0.84      | 0.33      | 0.40      | 0.25      | 4.35      | 1.26  |
| <b>V</b>  | 0.86          | 0.83      | 0.57      | 0.51      | 0.54      | 0.52      | 0.26      | 0.60  |
| <b>Cr</b> | 0.39          | 0.40      | 0.29      | 0.23      | 0.26      | 0.33      | 0.09      | 0.30  |
| <b>Mn</b> | 6.1           | 4.1       | 1.3       | 0.7       | 0.6       | 0.5       | 4.7       | 1.4   |
| <b>Fe</b> | 329.6         | 331.1     | 128.4     | 75.0      | 67.3      | 58.7      | 197.5     | 132.1 |
| <b>Co</b> | 0.08          | 0.07      | 0.05      | 0.04      | 0.04      | 0.04      | 0.03      | 0.05  |
| <b>Ni</b> | 0.95          | 0.91      | 0.91      | 0.81      | 0.82      | 0.82      | 0.10      | 0.85  |
| <b>Cu</b> | 1.21          | 1.37      | 1.32      | 1.17      | 1.12      | 1.15      | -0.01     | 1.23  |
| <b>As</b> | 0.93          | 0.92      | 0.72      | 0.70      | 0.78      | 0.70      | 0.17      | 0.76  |
| <b>Rb</b> | 0.66          | 0.72      | 0.71      | 0.60      | 0.64      | 0.61      | 0.00      | 0.65  |
| <b>Sr</b> | 58            | 58        | 68        | 58        | 60        | 59        | -3        | 61    |
| <b>Y</b>  | 0.56          | 0.41      | 0.36      | 0.28      | 0.27      | 0.25      | 0.24      | 0.31  |
| <b>Zr</b> | 0.46          | 0.42      | 0.31      | 0.26      | 0.25      | 0.30      | 0.15      | 0.31  |
| <b>Mo</b> | 0.46          | 0.42      | 0.49      | 0.43      | 0.43      | 0.44      | 0.01      | 0.44  |
| <b>Cd</b> | 0.004         | 0.002     | 0.002     | 0.002     | 0.002     | 0.002     | 0.003     | 0.002 |
| <b>Ba</b> | 12.5          | 11.8      | 12.5      | 10.5      | 10.6      | 12.0      | 1.0       | 11.5  |
| <b>La</b> | 0.664         | 0.490     | 0.362     | 0.251     | 0.232     | 0.222     | 0.353     | 0.311 |
| <b>Ce</b> | 0.990         | 0.757     | 0.518     | 0.355     | 0.325     | 0.302     | 0.539     | 0.451 |
| <b>Pr</b> | 0.156         | 0.121     | 0.091     | 0.065     | 0.059     | 0.056     | 0.078     | 0.078 |
| <b>Nd</b> | 0.633         | 0.487     | 0.370     | 0.271     | 0.249     | 0.232     | 0.311     | 0.322 |
| <b>Sm</b> | 0.129         | 0.099     | 0.079     | 0.058     | 0.054     | 0.051     | 0.061     | 0.068 |
| <b>Eu</b> | 0.024         | 0.019     | 0.016     | 0.012     | 0.011     | 0.011     | 0.010     | 0.014 |
| <b>Gd</b> | 0.128         | 0.095     | 0.080     | 0.058     | 0.056     | 0.052     | 0.060     | 0.068 |
| <b>Tb</b> | 0.017         | 0.014     | 0.011     | 0.008     | 0.008     | 0.007     | 0.008     | 0.010 |
| <b>Dy</b> | 0.090         | 0.071     | 0.062     | 0.045     | 0.042     | 0.042     | 0.038     | 0.052 |
| <b>Ho</b> | 0.018         | 0.015     | 0.013     | 0.010     | 0.009     | 0.009     | 0.007     | 0.011 |
| <b>Er</b> | 0.055         | 0.043     | 0.040     | 0.030     | 0.028     | 0.027     | 0.021     | 0.033 |
| <b>Tm</b> | 0.007         | 0.006     | 0.005     | 0.004     | 0.004     | 0.004     | 0.003     | 0.005 |
| <b>Yb</b> | 0.047         | 0.038     | 0.035     | 0.027     | 0.025     | 0.025     | 0.017     | 0.030 |
| <b>Lu</b> | 0.007         | 0.006     | 0.005     | 0.004     | 0.004     | 0.004     | 0.002     | 0.005 |
| <b>Hf</b> | 0.014         | 0.013     | 0.009     | 0.007     | 0.007     | 0.007     | 0.005     | 0.009 |
| <b>Pb</b> | 0.141         | 0.191     | 0.068     | 0.071     | 0.031     | 0.032     | 0.062     | 0.079 |
| <b>U</b>  | 0.196         | 0.196     | 0.212     | 0.182     | 0.183     | 0.181     | 0.005     | 0.191 |

Table S1 (continued)

|           | A-5   |           |           |           |           |           |           |       |
|-----------|-------|-----------|-----------|-----------|-----------|-----------|-----------|-------|
|           | GWV   | Milli_100 | Milli_200 | Milli_300 | Milli_400 | Milli-500 | A_clogged | Cj    |
| <b>Li</b> | 2.2   | 1.7       | 1.8       | 1.7       | 1.7       | 1.8       | 0.5       | 1.7   |
| <b>B</b>  | 15.5  | 12.1      | 13.4      | 12.9      | 13.0      | 13.4      | 2.6       | 12.9  |
| <b>Al</b> | 191.8 | 187.9     | 16.3      | 10.5      | 10.5      | 10.4      | 144.7     | 47.1  |
| <b>Si</b> | 4.73  | 4.30      | 4.02      | 4.04      | 4.26      | 4.21      | 0.56      | 4.17  |
| <b>Sc</b> | 0.08  | 0.07      | 0.04      | 0.04      | 0.04      | 0.04      | 0.03      | 0.04  |
| <b>Ti</b> | 4.89  | 4.36      | 0.41      | 0.28      | 0.28      | 0.21      | 3.78      | 1.11  |
| <b>V</b>  | 1.15  | 1.22      | 0.92      | 0.88      | 0.92      | 0.91      | 0.18      | 0.97  |
| <b>Cr</b> | 0.36  | 8.22      | 0.25      | 0.22      | 0.28      | 0.34      | -1.50     | 1.86  |
| <b>Mn</b> | 3.0   | 3.0       | 0.7       | 0.4       | 0.4       | 0.3       | 2.0       | 1.0   |
| <b>Fe</b> | 219.8 | 257.0     | 61.3      | 42.5      | 36.6      | 34.8      | 133.4     | 86.4  |
| <b>Co</b> | 0.09  | 0.10      | 0.05      | 0.05      | 0.05      | 0.05      | 0.03      | 0.06  |
| <b>Ni</b> | 1.29  | 0.99      | 0.98      | 0.93      | 0.93      | 0.96      | 0.33      | 0.96  |
| <b>Cu</b> | 1.68  | 2.13      | 1.39      | 1.31      | 1.27      | 1.35      | 0.19      | 1.49  |
| <b>As</b> | 1.03  | 1.00      | 0.92      | 0.92      | 0.91      | 0.94      | 0.09      | 0.94  |
| <b>Rb</b> | 0.89  | 0.66      | 0.57      | 0.56      | 0.55      | 0.59      | 0.31      | 0.59  |
| <b>Sr</b> | 95    | 74        | 82        | 80        | 81        | 82        | 15        | 80    |
| <b>Y</b>  | 0.42  | 0.28      | 0.21      | 0.18      | 0.18      | 0.18      | 0.21      | 0.20  |
| <b>Zr</b> | 0.48  | 0.39      | 0.19      | 0.17      | 0.18      | 0.32      | 0.24      | 0.25  |
| <b>Mo</b> | 0.93  | 0.87      | 0.79      | 0.75      | 0.78      | 0.80      | 0.13      | 0.80  |
| <b>Cd</b> | 0.004 | 0.006     | 0.003     | 0.001     | 0.002     | 0.002     | 0.001     | 0.003 |
| <b>Ba</b> | 19.6  | 14.4      | 15.6      | 14.9      | 15.4      | 15.6      | 4.4       | 15.2  |
| <b>La</b> | 0.479 | 0.327     | 0.177     | 0.143     | 0.137     | 0.126     | 0.297     | 0.182 |
| <b>Ce</b> | 0.701 | 0.487     | 0.236     | 0.193     | 0.172     | 0.164     | 0.451     | 0.250 |
| <b>Pr</b> | 0.113 | 0.079     | 0.045     | 0.038     | 0.035     | 0.032     | 0.067     | 0.046 |
| <b>Nd</b> | 0.457 | 0.322     | 0.193     | 0.161     | 0.148     | 0.145     | 0.263     | 0.194 |
| <b>Sm</b> | 0.092 | 0.067     | 0.043     | 0.036     | 0.035     | 0.031     | 0.049     | 0.042 |
| <b>Eu</b> | 0.019 | 0.014     | 0.010     | 0.008     | 0.008     | 0.008     | 0.010     | 0.009 |
| <b>Gd</b> | 0.095 | 0.064     | 0.044     | 0.037     | 0.037     | 0.031     | 0.052     | 0.043 |
| <b>Tb</b> | 0.013 | 0.009     | 0.006     | 0.005     | 0.005     | 0.005     | 0.007     | 0.006 |
| <b>Dy</b> | 0.070 | 0.050     | 0.035     | 0.031     | 0.028     | 0.027     | 0.036     | 0.034 |
| <b>Ho</b> | 0.014 | 0.010     | 0.008     | 0.006     | 0.006     | 0.006     | 0.007     | 0.007 |
| <b>Er</b> | 0.044 | 0.029     | 0.023     | 0.020     | 0.018     | 0.019     | 0.022     | 0.022 |
| <b>Tm</b> | 0.006 | 0.004     | 0.003     | 0.003     | 0.003     | 0.003     | 0.003     | 0.003 |
| <b>Yb</b> | 0.036 | 0.028     | 0.020     | 0.018     | 0.017     | 0.017     | 0.015     | 0.020 |
| <b>Lu</b> | 0.005 | 0.004     | 0.003     | 0.003     | 0.003     | 0.003     | 0.002     | 0.003 |
| <b>Hf</b> | 0.015 | 0.011     | 0.005     | 0.006     | 0.005     | 0.007     | 0.008     | 0.007 |
| <b>Pb</b> | 0.141 | 0.059     | 0.043     | 0.032     | 0.029     | 0.037     | 0.101     | 0.040 |
| <b>U</b>  | 0.221 | 0.173     | 0.186     | 0.179     | 0.179     | 0.192     | 0.041     | 0.182 |



Table S1 (continued)

|           | U-2   |           |           |           |           |           |           |       |
|-----------|-------|-----------|-----------|-----------|-----------|-----------|-----------|-------|
|           | GWV   | Milli_100 | Milli_200 | Milli_300 | Milli_400 | Milli-500 | A_clogged | Cj    |
| <b>Li</b> | 0.7   | 0.7       | 0.7       | 0.7       | 0.7       | 0.8       | 0.0       | 0.7   |
| <b>B</b>  | 4.3   | 3.9       | 3.7       | 3.8       | 3.8       | 3.9       | 0.5       | 3.8   |
| <b>Al</b> | 37.7  | 61.2      | 28.7      | 20.9      | 20.3      | 20.1      | 7.4       | 30.3  |
| <b>Si</b> | 5.49  | 5.26      | 5.41      | 5.37      | 5.32      | 5.66      | 0.09      | 5.40  |
| <b>Sc</b> | 0.04  | 0.03      | 0.03      | 0.04      | 0.03      | 0.03      | 0.01      | 0.03  |
| <b>Ti</b> | 1.16  | 1.57      | 0.66      | 0.45      | 0.69      | 0.57      | 0.38      | 0.79  |
| <b>V</b>  | 0.36  | 0.40      | 0.30      | 0.25      | 0.25      | 0.27      | 0.06      | 0.29  |
| <b>Cr</b> | 0.89  | 0.32      | 0.44      | 0.21      | 0.26      | 0.37      | 0.57      | 0.32  |
| <b>Mn</b> | 4.5   | 7.3       | 5.5       | 4.7       | 4.0       | 3.4       | -0.4      | 5.0   |
| <b>Fe</b> | 191.9 | 255.2     | 158.7     | 101.3     | 85.5      | 89.0      | 53.9      | 137.9 |
| <b>Co</b> | 0.06  | 0.08      | 0.05      | 0.05      | 0.05      | 0.05      | 0.01      | 0.05  |
| <b>Ni</b> | 0.96  | 0.79      | 0.86      | 0.76      | 0.72      | 0.83      | 0.17      | 0.79  |
| <b>Cu</b> | 1.44  | 1.42      | 1.15      | 1.19      | 1.45      | 1.31      | 0.14      | 1.30  |
| <b>As</b> | 0.95  | 0.92      | 0.88      | 0.77      | 0.80      | 0.83      | 0.11      | 0.84  |
| <b>Rb</b> | 0.62  | 0.63      | 0.64      | 0.61      | 0.63      | 0.65      | -0.01     | 0.63  |
| <b>Sr</b> | 39    | 37        | 37        | 37        | 37        | 37        | 2         | 37    |
| <b>Y</b>  | 0.47  | 0.47      | 0.41      | 0.39      | 0.37      | 0.37      | 0.07      | 0.40  |
| <b>Zr</b> | 0.19  | 0.16      | 0.14      | 0.20      | 0.14      | 0.15      | 0.03      | 0.16  |
| <b>Mo</b> | 0.30  | 0.17      | 0.16      | 0.15      | 0.18      | 0.17      | 0.13      | 0.16  |
| <b>Cd</b> | 0.009 | 0.012     | 0.006     | 0.009     | 0.013     | 0.017     | -0.003    | 0.012 |
| <b>Ba</b> | 7.8   | 11.9      | 6.6       | 6.4       | 6.3       | 6.5       | 0.3       | 7.5   |
| <b>La</b> | 0.414 | 0.400     | 0.316     | 0.284     | 0.262     | 0.250     | 0.111     | 0.302 |
| <b>Ce</b> | 0.575 | 0.632     | 0.447     | 0.390     | 0.355     | 0.344     | 0.141     | 0.434 |
| <b>Pr</b> | 0.113 | 0.126     | 0.092     | 0.081     | 0.079     | 0.077     | 0.022     | 0.091 |
| <b>Nd</b> | 0.481 | 0.516     | 0.404     | 0.361     | 0.335     | 0.325     | 0.093     | 0.388 |
| <b>Sm</b> | 0.112 | 0.113     | 0.097     | 0.086     | 0.084     | 0.082     | 0.020     | 0.092 |
| <b>Eu</b> | 0.023 | 0.023     | 0.020     | 0.018     | 0.018     | 0.020     | 0.003     | 0.020 |
| <b>Gd</b> | 0.115 | 0.122     | 0.100     | 0.091     | 0.086     | 0.084     | 0.018     | 0.096 |
| <b>Tb</b> | 0.017 | 0.016     | 0.014     | 0.013     | 0.014     | 0.016     | 0.002     | 0.014 |
| <b>Dy</b> | 0.085 | 0.088     | 0.073     | 0.069     | 0.065     | 0.065     | 0.013     | 0.072 |
| <b>Ho</b> | 0.017 | 0.017     | 0.015     | 0.014     | 0.015     | 0.017     | 0.002     | 0.015 |
| <b>Er</b> | 0.047 | 0.047     | 0.043     | 0.039     | 0.039     | 0.040     | 0.006     | 0.042 |
| <b>Tm</b> | 0.007 | 0.006     | 0.006     | 0.005     | 0.007     | 0.008     | 0.000     | 0.006 |
| <b>Yb</b> | 0.040 | 0.039     | 0.035     | 0.033     | 0.033     | 0.035     | 0.005     | 0.035 |
| <b>Lu</b> | 0.006 | 0.006     | 0.006     | 0.005     | 0.006     | 0.008     | 0.000     | 0.006 |
| <b>Hf</b> | 0.005 | 0.004     | 0.006     | 0.006     | 0.005     | 0.005     | -0.001    | 0.005 |
| <b>Pb</b> | 0.260 | 0.222     | 0.104     | 0.097     | 0.067     | 0.057     | 0.151     | 0.109 |
| <b>U</b>  | 0.050 | 0.051     | 0.047     | 0.045     | 0.056     | 0.060     | -0.002    | 0.052 |

Table S1 (continued)

|           | U-3   |           |           |           |           |           |           |       |
|-----------|-------|-----------|-----------|-----------|-----------|-----------|-----------|-------|
|           | GWV   | Milli_100 | Milli_200 | Milli_300 | Milli_400 | Milli-500 | A_clogged | Cj    |
| <b>Li</b> | 0.8   | 0.7       | 0.7       | 0.8       | 0.8       | 0.7       | 0.1       | 0.7   |
| <b>B</b>  | 9.2   | 8.3       | 8.8       | 9.0       | 9.3       | 9.1       | 0.4       | 8.9   |
| <b>Al</b> | 91.0  | 114.3     | 73.4      | 68.1      | 64.2      | 50.6      | 16.9      | 74.1  |
| <b>Si</b> | 5.63  | 5.52      | 5.67      | 5.83      | 5.73      | 5.81      | -0.08     | 5.71  |
| <b>Sc</b> | 0.10  | 0.04      | 0.06      | 0.08      | 0.07      | 0.05      | 0.04      | 0.06  |
| <b>Ti</b> | 1.26  | 1.95      | 0.75      | 0.93      | 0.78      | 0.66      | 0.25      | 1.01  |
| <b>V</b>  | 0.63  | 0.73      | 0.57      | 0.54      | 0.54      | 0.59      | 0.03      | 0.59  |
| <b>Cr</b> | 1.38  | 0.85      | 0.75      | 0.65      | 1.26      | 1.09      | 0.46      | 0.92  |
| <b>Mn</b> | 14.7  | 17.2      | 15.7      | 14.1      | 11.7      | 4.1       | 2.2       | 12.6  |
| <b>Fe</b> | 312.0 | 381.2     | 252.1     | 218.0     | 196.0     | 160.6     | 70.4      | 241.6 |
| <b>Co</b> | 0.12  | 0.12      | 0.11      | 0.10      | 0.10      | 0.07      | 0.02      | 0.10  |
| <b>Ni</b> | 1.29  | 1.31      | 1.33      | 1.27      | 1.26      | 1.28      | 0.00      | 1.29  |
| <b>Cu</b> | 1.51  | 1.49      | 1.41      | 1.42      | 1.46      | 1.55      | 0.05      | 1.47  |
| <b>As</b> | 0.70  | 0.75      | 0.72      | 0.67      | 0.68      | 0.65      | 0.01      | 0.69  |
| <b>Rb</b> | 0.86  | 0.89      | 0.90      | 0.94      | 0.97      | 0.91      | -0.06     | 0.92  |
| <b>Sr</b> | 42    | 39        | 41        | 42        | 44        | 41        | 1         | 41    |
| <b>Y</b>  | 0.82  | 0.71      | 0.68      | 0.67      | 0.67      | 0.61      | 0.15      | 0.67  |
| <b>Zr</b> | 0.35  | 0.33      | 0.33      | 0.35      | 0.32      | 0.32      | 0.02      | 0.33  |
| <b>Mo</b> | 0.55  | 0.40      | 0.42      | 0.40      | 0.49      | 0.47      | 0.11      | 0.44  |
| <b>Cd</b> | 0.016 | 0.014     | 0.011     | 0.012     | 0.008     | 0.010     | 0.005     | 0.011 |
| <b>Ba</b> | 11.0  | 11.7      | 11.4      | 11.7      | 11.7      | 10.8      | -0.5      | 11.5  |
| <b>La</b> | 0.761 | 0.619     | 0.575     | 0.551     | 0.527     | 0.472     | 0.212     | 0.549 |
| <b>Ce</b> | 1.227 | 1.107     | 0.986     | 0.944     | 0.903     | 0.755     | 0.288     | 0.939 |
| <b>Pr</b> | 0.206 | 0.183     | 0.166     | 0.165     | 0.158     | 0.139     | 0.044     | 0.162 |
| <b>Nd</b> | 0.878 | 0.774     | 0.701     | 0.690     | 0.673     | 0.596     | 0.191     | 0.687 |
| <b>Sm</b> | 0.195 | 0.174     | 0.163     | 0.159     | 0.156     | 0.139     | 0.037     | 0.158 |
| <b>Eu</b> | 0.043 | 0.039     | 0.037     | 0.036     | 0.036     | 0.031     | 0.007     | 0.036 |
| <b>Gd</b> | 0.200 | 0.176     | 0.164     | 0.160     | 0.156     | 0.140     | 0.041     | 0.159 |
| <b>Tb</b> | 0.028 | 0.024     | 0.023     | 0.023     | 0.023     | 0.021     | 0.005     | 0.023 |
| <b>Dy</b> | 0.153 | 0.131     | 0.126     | 0.125     | 0.123     | 0.113     | 0.030     | 0.123 |
| <b>Ho</b> | 0.030 | 0.026     | 0.025     | 0.024     | 0.025     | 0.023     | 0.005     | 0.025 |
| <b>Er</b> | 0.083 | 0.074     | 0.071     | 0.071     | 0.069     | 0.064     | 0.013     | 0.070 |
| <b>Tm</b> | 0.011 | 0.010     | 0.010     | 0.009     | 0.010     | 0.009     | 0.002     | 0.010 |
| <b>Yb</b> | 0.071 | 0.062     | 0.061     | 0.060     | 0.060     | 0.055     | 0.012     | 0.060 |
| <b>Lu</b> | 0.011 | 0.010     | 0.009     | 0.010     | 0.010     | 0.009     | 0.001     | 0.009 |
| <b>Hf</b> | 0.012 | 0.009     | 0.011     | 0.012     | 0.011     | 0.009     | 0.001     | 0.010 |
| <b>Pb</b> | cont  | cont      | cont      | cont      | cont      | cont      | nd        | nd    |
| <b>U</b>  | 0.048 | 0.044     | 0.042     | 0.043     | 0.043     | 0.047     | 0.004     | 0.044 |

**Table S2.** Concentration\* of dissolved/colloidal forms < 0.45 µm (C<sub>GWV</sub>), forms retained by Millipore membranes due to clogging (A<sub>clog</sub>), concentration of all particulates on the membranes (C<sub>part</sub>), and the share of A/C for the elements with notable clogging influence

|    | R-201, SS=5.2 mg/L; DOC=4.1 mg/L |        |        |      | R-210 | SS=24 mg/L; DOC=4.8 mg/l |        |      |  |
|----|----------------------------------|--------|--------|------|-------|--------------------------|--------|------|--|
|    | GWV                              | A_clog | C_part | A/C  | GWV   | A_clog                   | C_part | A/C  |  |
| Al | 72.00                            | 51.20  | 321.51 | 0.16 | 299.9 | 195.2                    | 1512.9 | 0.13 |  |
| Ti | 0.24                             | 0.15   | 14.93  | 0.01 | 7.30  | 5.33                     | 114.0  | 0.05 |  |
| V  | 0.28                             | 0.09   | 0.45   | 0.20 | 1.24  | 0.27                     | 2.3    | 0.12 |  |
| Cr | 0.12                             | nd     | 0.48   | nd   | 0.39  | 0.15                     | 1.46   | 0.10 |  |
| Mn | 129.0                            | 0.5    | 4.9    | 0.10 | 10.4  | 0.7                      | 39.2   | 0.02 |  |
| Fe | 127.9                            | 86.2   | 616.8  | 0.14 | 234.2 | 151.9                    | 1161.9 | 0.13 |  |
| Co | 0.313                            | 0.008  | 0.068  | 0.11 | 0.119 | 0.039                    | 0.387  | 0.10 |  |
| Y  | 0.063                            | 0.008  | 0.161  | 0.05 | 0.191 | 0.085                    | 0.579  | 0.15 |  |
| La | 0.031                            | 0.004  | 0.168  | 0.02 | 0.199 | 0.110                    | 0.654  | 0.17 |  |
| Ce | 0.047                            | 0.004  | 0.320  | 0.01 | 0.380 | 0.217                    | 1.423  | 0.15 |  |
| Pr | 0.008                            | 0.001  | 0.044  | 0.02 | 0.049 | 0.027                    | 0.174  | 0.15 |  |
| Nd | 0.039                            | 0.008  | 0.172  | 0.04 | 0.199 | 0.103                    | 0.684  | 0.15 |  |
| Sm | 0.009                            | 0.002  | 0.036  | 0.04 | 0.044 | 0.022                    | 0.146  | 0.15 |  |
| Eu | 0.004                            | 0.000  | 0.007  | 0.04 | 0.009 | 0.004                    | 0.028  | 0.15 |  |
| Gd | 0.015                            | 0.002  | 0.037  | 0.05 | 0.044 | 0.021                    | 0.139  | 0.15 |  |
| Tb | 0.001                            | 0.000  | 0.005  | 0.04 | 0.006 | 0.003                    | 0.020  | 0.16 |  |
| Dy | 0.009                            | 0.001  | 0.028  | 0.04 | 0.035 | 0.017                    | 0.115  | 0.15 |  |
| Ho | 0.002                            | 0.000  | 0.005  | 0.02 | 0.007 | 0.003                    | 0.023  | 0.13 |  |
| Er | 0.009                            | 0.001  | 0.015  | 0.05 | 0.023 | 0.009                    | 0.066  | 0.14 |  |
| Tm | 0.001                            | 0.000  | 0.002  | 0.01 | 0.003 | 0.001                    | 0.009  | 0.15 |  |
| Yb | 0.009                            | 0.001  | 0.013  | 0.07 | 0.019 | 0.008                    | 0.058  | 0.13 |  |
| Lu | 0.002                            | 0.000  | 0.002  | 0.01 | 0.003 | 0.001                    | 0.009  | 0.15 |  |
| Pb | 0.035                            | 0.025  | 0.114  | 0.22 | 0.147 | 0.083                    | 0.551  | 0.15 |  |

\* - µg/L; nd – not determined; SS – suspended solids, mg/L; DOC – dissolved organic carbon, mg/L

Table S2 (continued)

|           | R-91   | SS=110 mg/L; DOC=8.5 mg/L |                   |             | A-2   | SS=9 mg/L; DOC=6.6 mg/L |                   |             |
|-----------|--------|---------------------------|-------------------|-------------|-------|-------------------------|-------------------|-------------|
|           | GWV    | A <sub>clog</sub>         | C <sub>part</sub> | A/C         | GWV   | A <sub>clog</sub>       | C <sub>part</sub> | A/C         |
| <b>Al</b> | 142.66 | 121.55                    | 4498              | <b>0.03</b> | 167.5 | 41.3                    | 634.0             | <b>0.07</b> |
| <b>Ti</b> | 6.34   | 5.36                      | 489               | <b>0.01</b> | 3.9   | 1.9                     | 31.4              | <b>0.06</b> |
| <b>V</b>  | 2.05   | 0.19                      | 10.84             | <b>0.19</b> | 0.48  | 0.09                    | 0.69              | <b>0.13</b> |
| <b>Cr</b> | 0.52   | 0.20                      | 8.54              | <b>0.06</b> | 0.35  | nd                      | 0.53              | <b>nd</b>   |
| <b>Mn</b> | 11.1   | 6.9                       | 102.1             | <b>0.07</b> | 21.9  | 2.3                     | 14.1              | <b>0.16</b> |
| <b>Fe</b> | 158.5  | 114.3                     | 4625              | <b>0.02</b> | 314.1 | 83.6                    | 584.9             | <b>0.14</b> |
| <b>Co</b> | 0.139  | 0.056                     | 1.508             | <b>0.04</b> | 0.122 | 0.031                   | 0.118             | <b>0.26</b> |
| <b>Y</b>  | 0.549  | 0.158                     | 1.522             | <b>0.10</b> | 0.321 | 0.010                   | 0.243             | <b>0.04</b> |
| <b>La</b> | 0.400  | 0.157                     | 1.645             | <b>0.10</b> | 0.341 | 0.038                   | 0.402             | <b>0.09</b> |
| <b>Ce</b> | 0.688  | 0.341                     | 4.445             | <b>0.08</b> | 0.468 | 0.060                   | 0.718             | <b>0.08</b> |
| <b>Pr</b> | 0.109  | 0.034                     | 0.490             | <b>0.07</b> | 0.086 | 0.008                   | 0.095             | <b>0.08</b> |
| <b>Nd</b> | 0.483  | 0.156                     | 1.985             | <b>0.08</b> | 0.353 | 0.033                   | 0.355             | <b>0.09</b> |
| <b>Sm</b> | 0.112  | 0.041                     | 0.444             | <b>0.09</b> | 0.075 | 0.009                   | 0.068             | <b>0.13</b> |
| <b>Eu</b> | 0.025  | 0.008                     | 0.097             | <b>0.09</b> | 0.014 | 0.000                   | 0.013             | <b>0.01</b> |
| <b>Gd</b> | 0.119  | 0.038                     | 0.434             | <b>0.09</b> | 0.070 | 0.003                   | 0.062             | <b>0.05</b> |
| <b>Tb</b> | 0.017  | 0.005                     | 0.066             | <b>0.08</b> | 0.010 | 0.001                   | 0.009             | <b>0.06</b> |
| <b>Dy</b> | 0.094  | 0.029                     | 0.367             | <b>0.08</b> | 0.051 | 0.001                   | 0.047             | <b>0.02</b> |
| <b>Ho</b> | 0.019  | 0.005                     | 0.072             | <b>0.07</b> | 0.011 | 0.000                   | 0.009             | <b>0.02</b> |
| <b>Er</b> | 0.057  | 0.016                     | 0.214             | <b>0.08</b> | 0.033 | 0.001                   | 0.026             | <b>0.03</b> |
| <b>Tm</b> | 0.007  | 0.002                     | 0.030             | <b>0.07</b> | 0.005 | 0.000                   | 0.004             | <b>0.02</b> |
| <b>Yb</b> | 0.047  | 0.013                     | 0.196             | <b>0.07</b> | 0.031 | 0.001                   | 0.023             | <b>0.03</b> |
| <b>Lu</b> | 0.007  | 0.002                     | 0.029             | <b>0.07</b> | 0.005 | 0.000                   | 0.003             | <b>0.04</b> |
| <b>Pb</b> | nd     | nd                        | nd                | nd          | 0.099 | 0.050                   | 0.240             | <b>0.21</b> |

Table S2 (continued)

|           | A-4 SS=69 mg/L; DOC=9.3 mg/L |                   |                   |             | A-5 SS=108 mg/L; DOC=8.5 mg/L |                   |                   |              |
|-----------|------------------------------|-------------------|-------------------|-------------|-------------------------------|-------------------|-------------------|--------------|
|           | GWV                          | A <sub>clog</sub> | C <sub>part</sub> | A/C         | GWV                           | A <sub>clog</sub> | C <sub>part</sub> | A/C          |
| <b>Al</b> | 198.4                        | 138.8             | 6171.5            | <b>0.02</b> | 191.8                         | 144.7             | 6426              | <b>0.02</b>  |
| <b>Ti</b> | 5.6                          | 4.3               | 323.2             | <b>0.01</b> | 4.89                          | 3.78              | 551.0             | <b>0.01</b>  |
| <b>V</b>  | 0.86                         | 0.26              | 5.81              | <b>0.04</b> | 1.15                          | 0.18              | 9.50              | <b>0.02</b>  |
| <b>Cr</b> | 0.39                         | 0.09              | 3.78              | <b>0.02</b> | 0.36                          | -1.50             | 5.72              | <b>-0.26</b> |
| <b>Mn</b> | 6.1                          | 4.7               | 101.7             | <b>0.05</b> | 3.0                           | 2.0               | 112.6             | <b>0.02</b>  |
| <b>Fe</b> | 329.6                        | 197.5             | 3031.1            | <b>0.07</b> | 219.8                         | 133.4             | 4743              | <b>0.03</b>  |
| <b>Co</b> | 0.078                        | 0.027             | 0.997             | <b>0.03</b> | 0.094                         | 0.031             | 1.285             | <b>0.02</b>  |
| <b>Y</b>  | 0.558                        | 0.244             | 1.702             | <b>0.14</b> | 0.416                         | 0.211             | 1.595             | <b>0.13</b>  |
| <b>La</b> | 0.664                        | 0.353             | 2.519             | <b>0.14</b> | 0.479                         | 0.297             | 2.111             | <b>0.14</b>  |
| <b>Ce</b> | 0.990                        | 0.539             | 5.152             | <b>0.10</b> | 0.701                         | 0.451             | 4.929             | <b>0.09</b>  |
| <b>Pr</b> | 0.156                        | 0.078             | 0.656             | <b>0.12</b> | 0.113                         | 0.067             | 0.569             | <b>0.12</b>  |
| <b>Nd</b> | 0.633                        | 0.311             | 2.473             | <b>0.13</b> | 0.457                         | 0.263             | 2.237             | <b>0.12</b>  |
| <b>Sm</b> | 0.129                        | 0.061             | 0.488             | <b>0.13</b> | 0.092                         | 0.049             | 0.462             | <b>0.11</b>  |
| <b>Eu</b> | 0.024                        | 0.010             | 0.094             | <b>0.11</b> | 0.019                         | 0.010             | 0.093             | <b>0.10</b>  |
| <b>Gd</b> | 0.128                        | 0.060             | 0.437             | <b>0.14</b> | 0.095                         | 0.052             | 0.431             | <b>0.12</b>  |
| <b>Tb</b> | 0.017                        | 0.008             | 0.062             | <b>0.13</b> | 0.013                         | 0.007             | 0.064             | <b>0.12</b>  |
| <b>Dy</b> | 0.090                        | 0.038             | 0.341             | <b>0.11</b> | 0.070                         | 0.036             | 0.361             | <b>0.10</b>  |
| <b>Ho</b> | 0.018                        | 0.007             | 0.066             | <b>0.11</b> | 0.014                         | 0.007             | 0.072             | <b>0.09</b>  |
| <b>Er</b> | 0.055                        | 0.021             | 0.193             | <b>0.11</b> | 0.044                         | 0.022             | 0.210             | <b>0.10</b>  |
| <b>Tm</b> | 0.007                        | 0.003             | 0.027             | <b>0.11</b> | 0.006                         | 0.003             | 0.030             | <b>0.08</b>  |
| <b>Yb</b> | 0.047                        | 0.017             | 0.178             | <b>0.09</b> | 0.036                         | 0.015             | 0.199             | <b>0.08</b>  |
| <b>Lu</b> | 0.007                        | 0.002             | 0.026             | <b>0.09</b> | 0.005                         | 0.002             | 0.029             | <b>0.07</b>  |
| <b>Pb</b> | 0.141                        | 0.062             | 1.748             | <b>0.04</b> | 0.141                         | 0.101             | 2.573             | <b>0.04</b>  |

Table S2 (continued)

|    | U-2 SS=32 mg/L; DOC=7.4mg/L |                   |                   |      | U-3 SS=30 mg/L; DOC=14.7 mg/L |                   |                   |      |
|----|-----------------------------|-------------------|-------------------|------|-------------------------------|-------------------|-------------------|------|
|    | GWV                         | A <sub>clog</sub> | C <sub>part</sub> | A/C  | GWV                           | A <sub>clog</sub> | C <sub>part</sub> | A/C  |
| Al | 37.7                        | 7.4               | 1778              | 0.00 | 91.0                          | 16.9              | 1747              | 0.01 |
| Ti | 1.16                        | 0.38              | 103.5             | 0.00 | 1.26                          | 0.25              | 101.17            | 0.00 |
| V  | 0.36                        | 0.06              | 2.53              | 0.03 | 0.63                          | 0.03              | 2.45              | 0.01 |
| Cr | 0.89                        | 0.57              | 1.82              | 0.32 | 1.38                          | 0.46              | 1.70              | 0.27 |
| Mn | 4.5                         | 0.4               | 36.0              | 0.01 | 14.7                          | 2.2               | 35.1              | 0.06 |
| Fe | 191.9                       | 53.9              | 1185              | 0.05 | 312.0                         | 70.4              | 1243              | 0.06 |
| Co | 0.060                       | 0.005             | 0.370             | 0.01 | 0.120                         | 0.023             | 0.342             | 0.07 |
| Y  | 0.474                       | 0.073             | 0.472             | 0.15 | 0.817                         | 0.152             | 0.387             | 0.39 |
| La | 0.414                       | 0.111             | 0.591             | 0.19 | 0.761                         | 0.212             | 0.545             | 0.39 |
| Ce | 0.575                       | 0.141             | 1.413             | 0.10 | 1.227                         | 0.288             | 1.281             | 0.22 |
| Pr | 0.113                       | 0.022             | 0.171             | 0.13 | 0.206                         | 0.044             | 0.153             | 0.28 |
| Nd | 0.481                       | 0.093             | 0.678             | 0.14 | 0.878                         | 0.191             | 0.592             | 0.32 |
| Sm | 0.112                       | 0.020             | 0.145             | 0.14 | 0.195                         | 0.037             | 0.123             | 0.30 |
| Eu | 0.023                       | 0.003             | 0.029             | 0.10 | 0.043                         | 0.007             | 0.027             | 0.26 |
| Gd | 0.115                       | 0.018             | 0.140             | 0.13 | 0.200                         | 0.041             | 0.114             | 0.36 |
| Tb | 0.017                       | 0.002             | 0.020             | 0.11 | 0.028                         | 0.005             | 0.017             | 0.29 |
| Dy | 0.085                       | 0.013             | 0.111             | 0.12 | 0.153                         | 0.030             | 0.092             | 0.32 |
| Ho | 0.017                       | 0.002             | 0.022             | 0.08 | 0.030                         | 0.005             | 0.018             | 0.29 |
| Er | 0.047                       | 0.006             | 0.063             | 0.09 | 0.083                         | 0.013             | 0.053             | 0.25 |
| Tm | 0.007                       | 0.000             | 0.009             | 0.02 | 0.011                         | 0.002             | 0.008             | 0.23 |
| Yb | 0.040                       | 0.005             | 0.060             | 0.09 | 0.071                         | 0.012             | 0.051             | 0.23 |
| Lu | 0.006                       | 0.000             | 0.009             | 0.02 | 0.011                         | 0.001             | 0.007             | 0.18 |
| Pb | 0.260                       | 0.151             | 0.928             | 0.16 | 5.420                         | 0.100             | 0.753             | 0.13 |

\* - µg/L; nd – not determined; SS – suspended solids, mg/L; DOC – dissolved organic carbon, mg/L

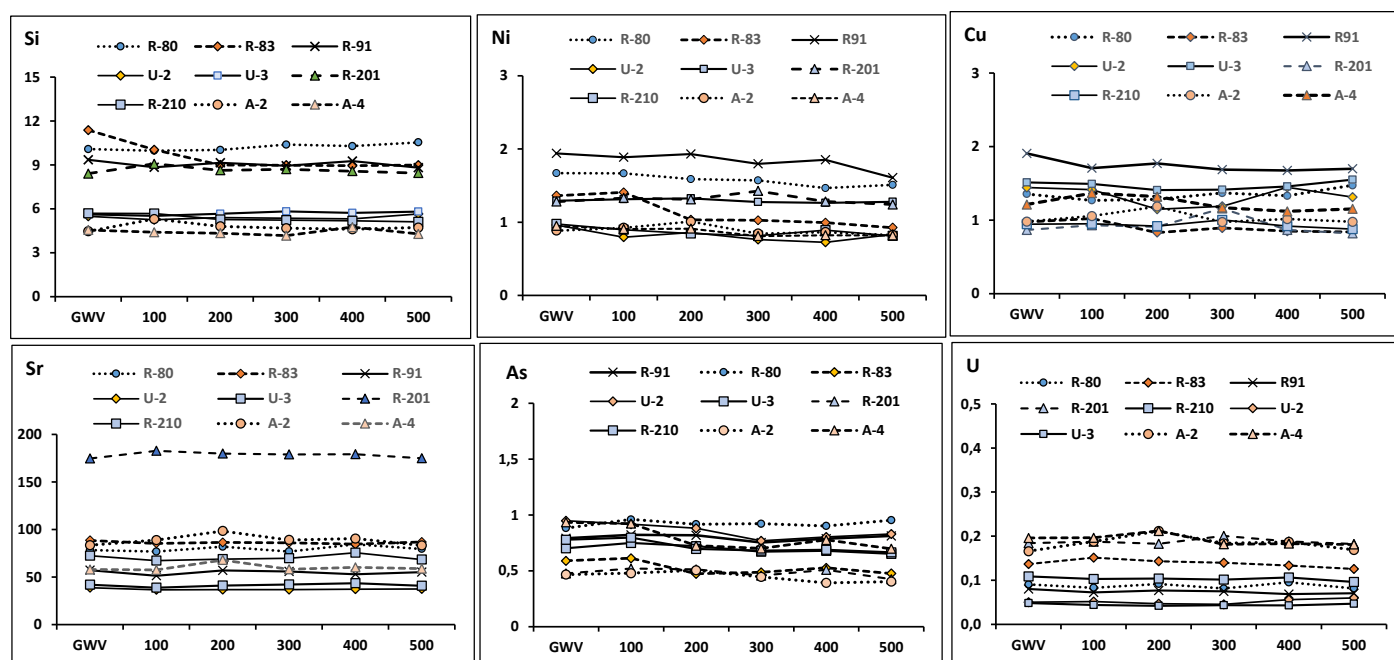

Figure S1: Concentration of Si (mg/L), and Ni, Cu, Sr, As, U (µg/L) in filtrates obtained at the capsules (GWV) after 500 ml and Millipore membranes after filtration of 100, 200, 300, 400, 500 ml.
